# Supplementary material
Source: publisher site journal article supplement (https://www.dovepress.com/article/404339)
Supplement: Supplementary file 1 [file get_supplementary_file.php]

## Supplementary

**Supplementary Table 1. Chromosomal location and identity of candidate SNPs**

| **Gene** | **rs#** | **position (GRCh38)** | | **aa substitution** | **Functional Consequence** | **TaqMan Assay ID** |
| --- | --- | --- | --- | --- | --- | --- |
| ***TAP1*** | rs41555220 | chr6:32852500 | 599 del C | 200 Splice Acceptor Variant | Splice Acceptor Variant | C__58670678_30 |
| rs41549617 | Chr6:32852191 | 762G>A | 254Gly>Gly | Synonymous Variant | C__15746834_30 |
| rs1057141 | Chr6:32850997 | 997T>C | 333Ile>Val | missense variant | C____549926_20 |
| rs1135216 | Chr6:32847198 | 1910T>C | 637Asp>Gly | missense variant | C____531909_20 |
| rs1057149 | chr6:32847165 | 1943C>T | 648Arg>Gln | missense variant | C__11917381_20 |
| rs41551515 | Chr6:32847125 | 1983C>T | 661pro>pro | Synonymous Variant | C__15746821_20 |
| ***TAP2*** | rs1042116 | Chr6:32830771 | 1308G>A | 436Asn>Asn | Synonymous Variant | C__11917123_20 |
| rs2228396 | Chr6:32830032 | 1396C>T | 565Ala>Thr | missense variant | NA |
| rs4148876 | Chr6:32829016 | 1951G>A | 651Arg>Cys | missense variant | C__30159972_10 |

**Supplementary Table 2. Definition of *TAP* alleles**

| *TAP1:* rs41555220-rs41549617-rs1057141-rs1135216-rs1057149-rs41551515 | |
| --- | --- |
| *TAP1*01:01* | C-G-T-T-C-C |
| *TAP1*02:01:01* | C-G-C-C-C-C |
| *TAP1*02:01:02* | C-G-C-C-C-T |
| *TAP1*03:01* | C-G-C-T-C-C |
| *TAP1*04:01* | C-G-C-C-T-C |
| *TAP1*05:01* | C-A-C-C-C-T |
| *TAP1*unknown_1* | C-G-T-C-C-C |
| *TAP1*unknown_2* | C-A-C-C-C-C |
| *TAP1*unknown_3* | C-A-T-C-C-T |
| *TAP1*unknown_4* | C-A-T-T-C-C |
| *TAP1*unknown_5* | C-G-T-C-C-T |
| *TAP2:* rs1042116-rs2228396-rs4148876 | |
| *TAP2*01:01* | G-C-G |
| *TAP2*01:02* | G-T-G |
| *TAP2*01:03* | G-C-A |
| *TAP2*02:01* | A-C-G |

**Note:** The genotypes of *TAP1* and *TAP2* were determined according to the SNP typing results and by referring to the *TAP1* and *TAP2* allele typing pattern diagram that was designed based on the IGMT database (http://www.ebi.ac.uk/imgt/hla/align.html) and the definition of the study by M. L. Feng et al., 2008.

**Supplementary Table 3. *TAP1-TAP2* haplotypes in TB patient and control group.**

| ***TAP1-TAP2*** | **Co(2n=870)** | **TB(2n=898)** | ***P*** | **OR(95%CI)** |
| --- | --- | --- | --- | --- |
| *TAP1*01:01-TAP2*01:01* | 565(0.649) | 606(0.675) | 0.258 | 1.120 (0.919-1.364) |
| *TAP1*02:01:01-TAP2*01:01* | 92(0.105) | 73(0.081) | 0.077 | 0.748 (0.542-1.032) |
| *TAP1*02:01:01-TAP2*01:02* | 46(0.052) | 55(0.061) | 0.448 | 1.168 (0.780-1.749) |
| *TAP1*01:01-TAP2*01:03* | 45(0.051) | 53(0.059) | 0.502 | 1.149 (0.764-1.730) |
| *TAP1*03:01-TAP2*01:01* | 32(0.036) | 28(0.031) | 0.515 | 0.842 (0.503-1.411) |
| *TAP1*01:01-TAP2*01:02* | 32(0.036) | 25(0.028) | 0.287 | 0.749 (0.440-1.276) |
| *TAP1*03:01-TAP2*01:02* | 23(0.026) | 21(0.023) | 0.68 | 0.881 (0.484-1.605) |
| *TAP1*01:01-TAP2*02:01* | 18(0.020) | 11(0.012) | 0.162 | 0.586 (0.275-1.25) |
| *TAP1*unknown_3-TAP2*01:02* | 1(0.001) | 18(0.020) | **1.17E-04** | 17.775 (2.367-133.444) |
| *Others* | 16(0.018) | 8(0.009) | 0.085 | 0.480(0.204-1.127) |

**Note:** Only frequency over 0.01, the haplotypes were listed and conparied in this table. After Bonferroni correction, the significance threshold is *P* <0.005. And the *P*-value lower than the significance threshold is marked in bold.

**Supplementary Table 4**. **Comparison of SNPs allele and genotype between stratified group with Control group.**

| **Gene** | **Comparison** | | **Co(n=870)** | **PTB(n=324)** | |  | **EPTB(n=125)** | |
| --- | --- | --- | --- | --- | --- | --- | --- | --- |
| **n(freq.)** | **n(freq.)** | ***P* OR(95%CI)** |  | **n(freq.)** | ***P* OR(95%CI)** |
| ***TAP1*** | **rs41549617** | | | | | | | |
| Allele | G | 859(0.987) | 629(0.971) | 0.021 |  | 245(0.980) | 0.388 |
| A | 11(0.013) | 19(0.029) | 2.359(1.115-4.992) |  | 5(0.020) | 1.594(0.548-4.631) |
| Genotype | GG | 424(0.975) | 305(0.941) | 0.019 |  | 120(0.960) | 0.384 |
| GA | 11(0.025) | 19(0.059) |  | 5(0.040) |
| AA | 0(0.000) | 0(0.000) |  | 0(0.000) |
| **rs1057141** | | | | | | | |
| Allele | T | 664(0.763) | 526(0.812) | 0.023 |  | 191(0.764) | 0.975 |
| C | 206(0.237) | 122(0.188) | 0.748(0.581-0.961) |  | 59(0.236) | 0.996(0.715-1.387) |
| Genotype | TT | 250(0.575) | 217(0.670) | 0.023 |  | 75(0.600) | 0.414 |
| TC | 164(0.377) | 92(0.284) |  | 41(0.328) |
| CC | 21(0.048) | 15(0.046) |  | 9(0.072) |
| DOM | TT | 250(0.575) | 217(0.670) | 0.008 |  | 75(0.600) | 0.614 |
| CT+CC | 185(0.425) | 107(0.330) | 0.666(0.494-0.899) |  | 50(0.400) | 0.901(0.601-1.351) |
| REC | TT+TC | 414(0.952) | 309(0.954) | 0.899 |  | 116(0.928) | 0.299 |
| CC | 21(0.048) | 15(0.046) | 0.957(0.485-1.887) |  | 9(0.072) | 1.530(0.682-3.430) |
| **rs1135216** | | | | | | | |
| Allele | T | 718(0.825) | 535(0.826) | 0.987 |  | 209(0.836) | 0.693 |
| C | 152(0.175) | 113(0.174) | 0.998(0.763-1.304) |  | 41(0.164) | 0.927(0.635-1.352) |
| Genotype | TT | 297(0.683) | 217(0.669) | 0.405 |  | 88(0.704) | 0.897 |
| TC | 124(0.285) | 101(0.312) |  | 33(0.264) |
| CC | 14(0.032) | 6(0.019) |  | 4(0.032) |
| DOM | TT | 297(0.683) | 217(0.669) | 0.705 |  | 88(0.704) | 0.652 |
| CT+CC | 138(0.317) | 107(0.330) | 1.061(0.781-1.443) |  | 37(0.296) | 0.905(0.586-1.396) |
| REC | TT+TC | 421(0.968) | 318(0.981) | 0.245 |  | 121(0.968) | 0.992 |
| CC | 14(0.032) | 6(0.019) | 0.567(0.216-1.493) |  | 4(0.032) | 0.994(0.321-3.076) |
| **rs1057149** | | | | | | | |
| Allele | C | 867(0.997) | 648(1.000) | 0.135 |  | 250(1.000) | 0.323 |
| T | 3(0.003) | 0(0.000) | 0.472(0.046-4.291) |  | 0(0.000) | 1.151(0.119-11.118) |
| Genotype | CC | 432(0.993) | 324(1.000) | 0.134 |  | 125(1.000) | 0.352 |
| CT | 3(0.007) | 0(0.000) |  | 0(0.000) |
| TT | 0(0.000) | 0(0.000) |  | 0(0.000) |
| **rs41551515** | | | | | | | |
| Allele | C | 864(0.993) | 629(0.971) | 6.84E-04 |  | 244(0.976) | 0.021 |
| T | 6(0.007) | 19(0.029) | 4.350(1.727-10.954) |  | 6(0.024) | 3.541(1.132-11.077) |
| Genotype | CC | 429(0.986) | 305(0.941) | 6.21E-04 |  | 119(0.952) | 0.019 |
| CT | 6(0.014) | 19(0.059) |  | 6(0.048) |
| TT | 0(0.000) | 0(0.000) |  | 0(0.000) |
| ***TAP2*** | **rs1042116** | | | | | | | |
| Allele | G | 852(0.979) | 640(0.988) | 0.215 |  | 247(0.988) | 0.371 |
| A | 18(0.021) | 8(0.012) | 0.592(0.256-1.369) |  | 3(0.012) | 0.575(0.168-1.968) |
| Genotype | GG | 417(0.959) | 316(0.975) | 0.211 |  | 122(0.976) | 0.367 |
| GA | 18(0.041) | 8(0.025) |  | 3(0.024) |
| AA | 0(0.000) | 0(0.000) |  | 0(0.000) |
| **rs2228396** | | | | | | | |
| Allele | C | 762(0.876) | 568(0.877) | 0.968 |  | 207(0.828) | 0.051 |
| T | 108(0.124) | 80(0.123) | 1.006(0.739-1.370) |  | 43(0.172) | 1.466(0.997-2.155) |
| Genotype | CC | 336(0.772) | 251(0.775) | 0.991 |  | 88(0.704) | 0.131 |
| CT | 90(0.207) | 66(0.204) |  | 31(0.248) |
| TT | 9(0.021) | 7(0.022) |  | 6(0.048) |
| DOM | CC | 336(0.772) | 251(0.775) | 0.941 |  | 88(0.704) | 0.116 |
| TC+TT | 99(0.228) | 73(0.225) | 0.987(0.700-1.392) |  | 37(0.296) | 1.427(0.915-2.226) |
| REC | CC+CT | 426(0.979) | 317(0.975) | 0.931 |  | 119(0.952) | 0.096 |
| TT | 9(0.021) | 7(0.022) | 1.045(0.385-2.837) |  | 6(0.048) | 2.387(0.833-6.839) |
| **rs4148876** | | | | | | | |
| Allele | G | 822(0.945) | 609(0.940) | 0.678 |  | 236(0.944) | 0.959 |
| A | 48(0.055) | 39(0.060) | 1.097(0.710-1.695) |  | 14(0.056) | 1.015(0.551-1.875) |
| Genotype | GG | 389(0.894) | 286(0.883) | 0.806 |  | 111(0.888) | 0.708 |
| GA | 44(0.101) | 37(0.114) |  | 14(0.112) |
| AA | 2(0.005) | 1(0.003) |  | 0(0.000) |
| DOM | GG | 389(0.894) | 286(0.883) | 0.616 |  | N.A | |
| AA+AG | 46(0.106) | 38(0.117) | 1.124(0.712-1.773) |  |
| REC | AG+GG | 433(0.995) | 323(0.997) | 0.743 |  |
| AA | 2(0.005) | 1(0.003) | 0.671(0.061-7.424) |  |

**Note:** After Bonferroni correction, the significance threshold is *P* <0.00625. And the *P*-value lower than the significance threshold is marked in bold.

**Supplementary Table 5. rs1057141 and rs1135216 combination effect analysis**

| **rs1057141-rs1135216** | **Co(n=870)** | **PTB(n=324)** | | |  | **EPTB(n=125)** | | |
| --- | --- | --- | --- | --- | --- | --- | --- | --- |
| **n(freq.)** | **n(freq.)** | ***P*** | **OR(95%CI)** |  | **n(freq.)** | ***P*** | **OR(95%CI)** |
| T-T | 662(0.76) | 510(0.787) | 0.23 | 1.161 (0.909-1.482) |  | 185(0.74) | 0.497 | 0.894 (0.647-1.234) |
| C-C | 150(0.172) | 97(0.149) | 0.235 | 0.845 (0.639-1.116) |  | 24(0.096) | 0.086 | 1.543 (0.935-2.545) |
| C-T | 56(0.064) | 25(0.038) | 0.027 | 0.583 (0.359-0.945) |  | 35(0.14) | 0.223 | 0.781 (0.524-1.163) |
| T-C | 2(0.002) | 16(0.024) | 6.70E-05 | 10.987 (2.517-47.957) |  | 6(0.024) | 3.29E-04 | 10.672 (2.14-53.21) |

**Supplementary Table 6. The distribution of TAP allele in stratified group and control group.**

| ***TAP1* allele** | **Co(2n=870)** | **PTB (2n=648)** | | |  | **EPTB(2n=250)** | | |
| --- | --- | --- | --- | --- | --- | --- | --- | --- |
| **num.(freq)** | **num.(freq)** | ***P*** | **OR(95%CI)** | **num.(freq)** | ***P*** | **OR(95%CI)** |
| *TAP1*01:01* | 660(0.758) | 510(0.787) | 0.193 | 1.176(0.921-1.501) |  | 185(0.740) | 0.547 | 0.906(0.656-1.250) |
| *TAP1*02:01:01* | 139(0.159) | 93(0.143) | 0.384 | 0.881(0.663-1.172) |  | 35(0.140) | 0.447 | 0.856(0.573-1.278) |
| *TAP1*03:01* | 56(0.064) | 25(0.038) | 0.027 | 0.583(0.360-0.945) |  | 24(0.096) | 0.087 | 1.544(0.936-2.546) |
| *TAP1*04:01* | 3(0.003) | 0(0.000) | 0.135 | 0.445(0.046-4.291) |  | 0(0.000) | 0.353 | 1.151(0.119-11.118) |
| *TAP1*05:01* | 5(0.005) | 4(0.006) | 0.915 | 1.075(0.287-4.017) |  | 0(0.000) | 0.230 | 0.689(0.080-5.927) |
| *TAP1*unknown_1* | 1(0.001) | 1(0.001) | 0.834 | 1.343(0.084-21.514) |  | 0(0.000) | 0.592 | 3.462(0.216-55.551) |
| *TAP1*unknown_2* | 3(0.003) | 0(0.000) | 0.135 | 0.445(0.046-4.291) |  | 0(0.000) | 0.353 | 1.151(0.119-11.118) |
| *TAP1*unknown_3* | 1(0.001) | 15(0.023) | **3.31E-05** | 20.592(2.713-156.302) | | 5(0.020) | **3.19E-04** | 11.735(2.062-152.516) |
| *TAP1*unknown_4* | 2(0.002) | 0(0.000) | 0.222 | 0.669(0.061-7.391) |  | 0(0.000) | 0.448 | 1.729(0.156-19.148) |
| *TAP1*unknown_5* | 0(0.000) | 0(0.000) | 0.222 | 0.669(0.061-7.391) |  | 1(0.004) | 0.062 | 3.498(0.218-56.127) |
| ***TAP2* allele** |  |  |  |  |  |  |  |  |
| *TAP2*01:01* | 696(0.800) | 521(0.804) | 0.846 | 1.026(0.794-1.324) |  | 190(0.760) | 0.170 | 0.792(0.567-1.106) |
| *TAP2*01:02* | 108(0.124) | 80(0.123) | 0.968 | 0.994(0.730-1.353) |  | 43(0.172) | 0.051 | 1.466(0.997-2.155) |
| *TAP2*01:03* | 48(0.055) | 39(0.060) | 0.678 | 1.097(0.710-1.695) |  | 14(0.056) | 0.960 | 1.016(0.551-1.875) |
| *TAP2*02:01* | 18(0.021) | 8(0.012) | 0.215 | 0.592(0.256-1.369) |  | 3(0.012) | 0.372 | 0.575(0.168-1.968) |

**Note:** After Bonferroni correction, the significance threshold is *P* <0.00357. And the *P*-value lower than the significance threshold is marked in bold.

**Supplementary Table 7. The distribution of *TAP* genotype in stratified group and control group.**

| ***TAP1* Common genotypes** | **Co(n=435)** | **PTB(n=324)** | | |  | **EPTB(n=125)** | | |
| --- | --- | --- | --- | --- | --- | --- | --- | --- |
| **num.(freq)** | **num.(freq)** | ***P*** | **OR(95%CI)** |  | **num.(freq)** | ***P*** | **OR(95%CI)** |
| *TAP1*01:01/TAP1*01:01* | 246(0.565) | 201(0.620) | 0.129 | 1.256(0.936-1.648) |  | 69(0.552) | 0.788 | 0.947(0.634-1.413) |
| *TAP1*01:01/TAP1*02:01:01* | 110(0.252) | 78(0.241) | 0.702 | 0.937(0.671-1.308) |  | 25(0.200) | 0.223 | 0.739(0.453-1.204) |
| *TAP1*01:01/TAP1*03:01* | 46(0.105) | 14(0.043) | **0.001** | 0.364(0.197-0.673) |  | 16(0.128) | 0.485 | 1.241(0.676-2.278) |
| *TAP1*01:01/TAP1*04:01* | 2(0.004) | 0(0.000) | 0.222 | 0.666(0.060-7.379) |  | 0(0.000) | 0.448 | 1.718(0.155-19.106) |
| *TAP1*01:01/TAP1*05:01* | 4(0.009) | 0(0.000) | 0.084 | 0.332(0.037-2.980) |  | 0(0.000) | 0.282 | 0.855(0.095-7.720) |
| *TAP1*01:01/TAP1*unknown_1* | 1(0.002) | 1(0.003) | 0.834 | 1.344(0.084-21.563) |  | 0(0.000) | 0.592 | 3.444(0.214-55.463) |
| *TAP1*01:01/TAP1*unknown_2* | 2(0.004) | 0(0.000) | 0.222 | 0.666(0.060-7.379) |  | 0(0.000) | 0.448 | 1.718(0.155-19.106) |
| *TAP1*01:01/TAP1*unknown_3* | 1(0.002) | 15(0.046) | **2.99E-05** | 21.068(2.768-160.338) |  | 5(0.040) | **3.08E-04** | 18.083(2.093-156.266) |
| *TAP1*01:01/TAP1*unknown_4* | 2(0.004) | 0(0.000) | 0.222 | 0.666(0.060-7.379) |  | 0(0.000) | 0.448 | 1.718(0.155-19.106) |
| *TAP1*01:01/TAP1*unknown_5* | 0(0.000) | 0(0.000) | - | - |  | 1(0.008) | 0.062 | 3.516(0.218-56.621) |
| *TAP1*02:01:01/TAP1*02:01:01* | 11(0.025) | 4(0.012) | 0.205 | 0.482(0.152-1.527) |  | 4(0.032) | 0.682 | 1.274(0.399-4.073) |
| *TAP1*02:01:01/TAP1*03:01* | 4(0.009) | 5(0.015) | 0.432 | 1.689(0.450-6.340) |  | 2(0.080) | 0.515 | 1.752(0.317-9.679) |
| *TAP1*02:01:01/TAP1*04:01* | 1(0.002) | 0(0.000) | 0.388 | 1.335(0.083-21.430) |  | 0(0.000) | 0.592 | 3.444(0.214-55.463) |
| *TAP1*02:01:01/TAP1*05:01* | 1(0.002) | 2(0.006) | 0.400 | 2.696(0.243-29.858) |  | 0(0.000) | 0.592 | 3.444(0.214-55.463) |
| *TAP1*02:01:01/TAP1*unknown_2* | 1(0.002) | 0(0.000) | 0.388 | 1.335(0.083-21.430) |  | 0(0.000) | 0.592 | 3.444(0.214-55.463) |
| *TAP1*03:01/TAP1*03:01* | 3(0.006) | 2(0.006) | 0.903 | 0.894(0.149-5.384) |  | 3(0.024) | 0.102 | 3.541(0.706-17.766) |
| *TAP1*03:01/TAP1*05:01* | 0(0.000) | 2(0.006) | 0.101 | 2.708(0.244-29.996) |  | 0(0.000) | - | - |
| ***TAP2 Common genotypes*** |  |  |  |  |  |  |  |  |
| *TAP2*01:01/TAP2*01:01* | 278(0.639) | 219(0.676) | 0.291 | 1.178(0.869-1.596) |  | 75(0.600) | 0.425 | 0.847(0.563-1.274) |
| *TAP2*01:01/TAP2*01:02* | 84(0.193) | 53(0.164) | 0.296 | 0.817(0.560-1.193) |  | 27(0.216) | 0.571 | 1.151(0.707-1.875) |
| *TAP2*01:01/TAP2*01:03* | 40(0.092) | 24(0.074) | 0.381 | 0.790(0.466-1.339) |  | 10(0.080) | 0.680 | 0.859(0.417-1.770) |
| *TAP2*01:01/TAP2*02:01* | 16(0.037) | 6(0.019) | 0.138 | 0.494(0.191-1.277) |  | 3(0.024) | 0.487 | 0.644(0.185-2.247) |
| *TAP2*01:02/TAP2*01:02* | 9(0.021) | 7(0.022) | 0.931 | 1.045(0.385-2.837) |  | 6(0.048) | 0.096 | 2.387(0.833-6.839) |
| *TAP2*01:02/TAP2*01:03* | 4(0.009) | 12(0.037) | 0.008 | 4.144(1.324-12.970) |  | 4(0.032) | 0.058 | 3.562(0.878-14.452) |
| *TAP2*01:02/TAP2*02:01* | 2(0.004) | 1(0.003) | 0.743 | 0.670(0.061-7.424) |  | 0(0.000) | 0.448 | 1.718(0.155-19.106) |
| *TAP2*01:03/TAP2*01:03* | 2(0.004) | 1(0.003) | 0.743 | 0.670(0.061-7.424) |  | 0(0.000) | 0.448 | 1.718(0.155-19.106) |
| *TAP2*01:03/TAP2*02:01* | 0(0.000) | 1(0.003) | 0.246 | 1.350(0.084-21.662) |  | 0(0.000) | - | - |

**Note:** After Bonferroni correction, the significance threshold is *P* <0.001923. And the *P*-value lower than the significance threshold is marked in bold.

**Supplementary Table 8. Comparison of *TAP1-TAP2* haplotype frequency in stratified group and control group.**

| ***TAP1-TAP2* haplotype** | **Co(2n=870)** | **PTB(2n=648)** | | |  | | **EPTB(2n=250)** | | | | | |
| --- | --- | --- | --- | --- | --- | --- | --- | --- | --- | --- | --- | --- |
| **num.(freq)** | **num.(freq)** | ***P*** | **OR(95%CI)** |  | | **num.(freq)** | | ***P*** | | **OR(95%CI)** | |
| *TAP1*01:01-TAP2*01:01* | 565(0.649) | 449(0.692) | 0.075 | 1.217 (0.980-1.513) |  | | 157(0.628) | | 0.532 | | 0.911 (0.680-1.22) | |
| *TAP1*02:01:01-TAP2*01:01* | 92(0.105) | 58(0.089) | 0.294 | 0.831 (0.588-1.174) |  | | 15(0.060) | | 0.030 | | 0.539 (0.306-0.949) | |
| *TAP1*02:01:01-TAP2*01:02* | 46(0.052) | 35(0.054) | 0.922 | 1.022 (0.650-1.607) |  | | 20(0.080) | | 0.108 | | 1.557 (0.903-2.686) | |
| *TAP1*01:01-TAP2*01:03* | 45(0.051) | 39(0.060) | 0.475 | 1.174 (0.755-1.825) |  | | 14(0.056) | | 0.789 | | 1.087 (0.586-2.015) | |
| *TAP1*03:01-TAP2*01:01* | 32(0.036) | 12(0.018) | 0.035 | 0.494 (0.252-0.966) |  | | 16(0.064) | | 0.061 | | 1.790 (0.965-3.319) | |
| *TAP1*01:01-TAP2*01:02* | 32(0.036) | 14(0.021) | 0.087 | 0.578 (0.305-1.092) |  | | 11(0.044) | | 0.600 | | 1.205 (0.598-2.427) | |
| *TAP1*03:01-TAP2*01:02* | 23(0.026) | 13(0.020) | 0.419 | 0.753 (0.378-1.499) |  | | 8(0.032) | | 0.636 | | 1.217 (0.537-2.756) | |
| *TAP1*01:01-TAP2*02:01* | 18(0.020) | 8(0.012) | 0.215 | 0.591 (0.255-1.369) |  | | 3(0.012) | | 0.371 | | 0.574 (0.167-1.967) | |
| *TAP1*unknown_3-TAP2*01:02* | 1(0.001) | 14(0.021) | **6.74E-05** | 19.189 (2.516-146.309) | | 4(0.016) | | **0.001** | | 14.130 (1.572-127.004) | |
| *others* | 16(0.018) | 6(0.009) | 0.141 | 0.499(0.194-1.282) |  | | 2(0.008) | | 0.250 | | 0.430(0.098-1.885) | |

**Note:** Only the haplotypes with frequency over 0.03 were listed and comparied. After Bonferroni correction, the significance threshold is *P* <0.005.
